# Supplementary material
Source: Springer Nature journal article supplement (https://www.springermedizin.de/resource/supplementary/12936_2006_257_MOESM1_ESM.pdf/9547320)

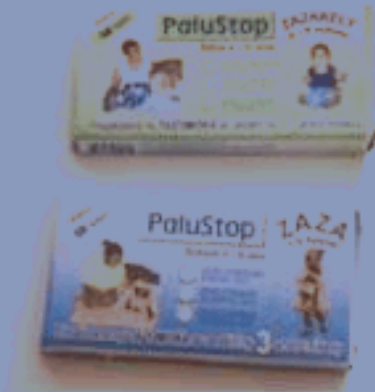

PaluStop®

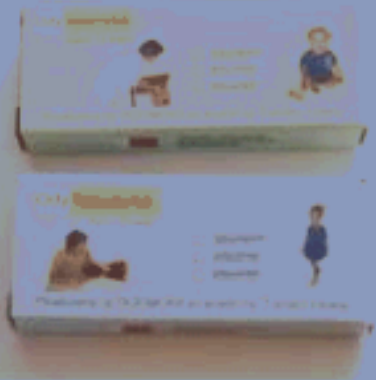

Ody Tazomoka®

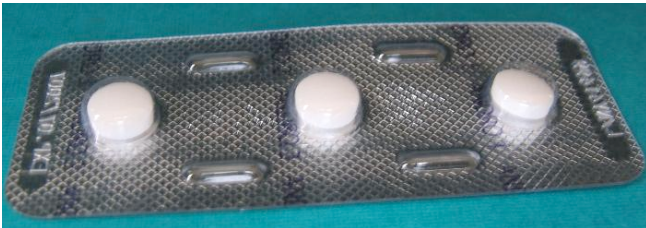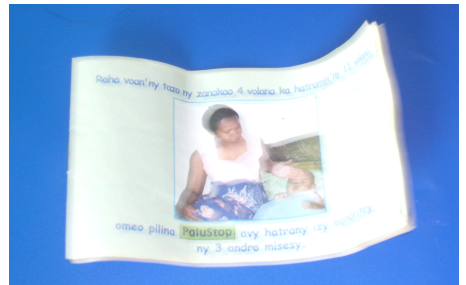

Supplement: MOESM1 [file 9547320]
